# Supplementary material for: Exploring Serum Biomarkers for Neuropathic Pain in Rat Models of Chemotherapy-Induced Peripheral Neuropathy: A Comparative Pilot Study with Oxaliplatin, Paclitaxel, Bortezomib, and Vincristine
Source: MDPI journal article supplement (doi:10.3390/toxics11121004), 2023-12-08
Supplement: s1 [file s1]

## Supplementary file

**Table S1.** Technical characteristics of biomarker monitoring

| Proteins                                                  | Function of proteins                                                                  | Apparatus                                               | Commercial kits                          | LLOQ (pg/mL) |
|-----------------------------------------------------------|---------------------------------------------------------------------------------------|---------------------------------------------------------|------------------------------------------|--------------|
| EGF – Epidermal growth factor                             | Stimulates the growth of various epidermal and epithelial tissues                     | Bio-Plex® 200 System<br>Bio-Rad Laboratories, Inc., USA | RECYMAG65K27PMX<br>Merck®, France        | 0.9          |
| Eotaxin – CCL11                                           | Chemotaxis, Inflammatory response                                                     | Bio-Plex® 200 System<br>Bio-Rad Laboratories, Inc., USA | RECYMAG65K27PMX<br>Merck®, France        | 4.7          |
| Fractalkine – CX3CL1                                      | Cell adhesion, Chemotaxis, Host-virus interaction, Inflammatory response              | Bio-Plex® 200 System<br>Bio-Rad Laboratories, Inc., USA | RECYMAG65K27PMX<br>Merck®, France        | 0.7          |
| G-CSF – Granulocyte-Colony Stimulating Factor             | growth and differentiation of granulocytes and the monocytes-macrophages              | Bio-Plex® 200 System<br>Bio-Rad Laboratories, Inc., USA | RECYMAG65K27PMX<br>Merck®, France        | 4.5          |
| GFAP – Glial fibrillary acidic protein                    | Cell-specific marker of astrocytes                                                    | ELISA microplate reader Biotek                          | orb439741<br>Biorbyt, Cambridgeshire, UK | 15.6         |
| GM-CSF – Granulocyte-Macrophage Colony-Stimulating Factor | Growth and differentiation of granulocytes, macrophages, eosinophils and erythrocytes | Bio-Plex® 200 System<br>Bio-Rad Laboratories, Inc., USA | RECYMAG65K27PMX<br>Merck®, France        | 10.0         |
| GRO/KC – Growth regulated $\alpha$ protein, CXCL1         | Inflammatory response                                                                 | Bio-Plex® 200 System<br>Bio-Rad Laboratories, Inc., USA | RECYMAG65K27PMX<br>Merck®, France        | 58.2         |
| IFN $\gamma$ – Interferon gamma                           | Antiviral defense, Growth regulation                                                  | Bio-Plex® 200 System<br>Bio-Rad Laboratories, Inc., USA | RECYMAG65K27PMX<br>Merck®, France        | 10.5         |
| IL-1 $\alpha$ – Interleukin 1 alpha                       | Inflammatory response                                                                 | Bio-Plex® 200 System<br>Bio-Rad Laboratories, Inc., USA | RECYMAG65K27PMX<br>Merck®, France        | 39.9         |
| IL-1 $\beta$ – Interleukin 1 beta                         | Inflammatory response                                                                 | Bio-Plex® 200 System<br>Bio-Rad Laboratories, Inc., USA | RECYMAG65K27PMX<br>Merck®, France        | 2.3          |
| IL-2 – Interleukin 2                                      | Adaptive immunity, Immunity                                                           | Bio-Plex® 200 System<br>Bio-Rad Laboratories, Inc., USA | RECYMAG65K27PMX<br>Merck®, France        | 9.9          |
| IL-4 – Interleukin 4                                      | B-cell activation                                                                     | Bio-Plex® 200 System<br>Bio-Rad Laboratories, Inc., USA | RECYMAG65K27PMX<br>Merck®, France        | 17.9         |
| IL-5 – Interleukin 5                                      | Survival, differentiation, and chemotaxis of eosinophils                              | Bio-Plex® 200 System<br>Bio-Rad Laboratories, Inc., USA | RECYMAG65K27PMX<br>Merck®, France        | 19.8         |
| IL-6 – Interleukin 6                                      | Pro-inflammatory function (acute phase)                                               | Bio-Plex® 200 System<br>Bio-Rad Laboratories, Inc., USA | RECYMAG65K27PMX<br>Merck®, France        | 279.9        |
| IL-10 – Interleukin 10                                    | Anti-inflammatory functions                                                           | Bio-Plex® 200 System<br>Bio-Rad Laboratories, Inc., USA | RECYMAG65K27PMX<br>Merck®, France        | 8.3          |
| IL-12(p70) – Interleukin 12                               | Host-virus interaction                                                                | Bio-Plex® 200 System<br>Bio-Rad Laboratories, Inc., USA | RECYMAG65K27PMX<br>Merck®, France        | 40.3         |

|                                                                                           |                                                                            |                                                         |                                                      |      |
|-------------------------------------------------------------------------------------------|----------------------------------------------------------------------------|---------------------------------------------------------|------------------------------------------------------|------|
| IL-13 – Interleukin 13                                                                    | Allergic inflammation and immune response to parasite infection            | Bio-Plex® 200 System<br>Bio-Rad Laboratories, Inc., USA | RECYMAG65K27PMX<br>Merck®, France                    | 17.5 |
| IL-17A – Interleukin 17a                                                                  | Adaptive immunity, Immunity, Inflammatory response, Innate immunity        | Bio-Plex® 200 System<br>Bio-Rad Laboratories, Inc., USA | RECYMAG65K27PMX<br>Merck®, France                    | 6.8  |
| IL-18 – Interleukin 18                                                                    | Inflammatory response                                                      | Bio-Plex® 200 System<br>Bio-Rad Laboratories, Inc., USA | RECYMAG65K27PMX<br>Merck®, France                    | 6.2  |
| IP-10 – Interferon gamma-induced protein 10, CXCL10                                       | Chemotaxis, Inflammatory response                                          | Bio-Plex® 200 System<br>Bio-Rad Laboratories, Inc., USA | RECYMAG65K27PMX<br>Merck®, France                    | 1.4  |
| Leptin                                                                                    | Regulation of energy balance<br>Pro-inflammatory function                  | Bio-Plex® 200 System<br>Bio-Rad Laboratories, Inc., USA | RECYMAG65K27PMX<br>Merck®, France                    | 10.2 |
| LIX – Lipopolysaccharide-induced CXC chemokine, CXCL5                                     | Neutrophil activation                                                      | Bio-Plex® 200 System<br>Bio-Rad Laboratories, Inc., USA | RECYMAG65K27PMX<br>Merck®, France                    | 20.9 |
| MCP-1 - monocyte chemoattractant protein 1, CCL2                                          | Chemotaxis, Inflammatory response                                          | Bio-Plex® 200 System<br>Bio-Rad Laboratories, Inc., USA | RECYMAG65K27PMX<br>Merck®, France                    | 9.0  |
| MIP-1α – Macrophage inflammatory protein-1 alpha, CCL3                                    | Chemotaxis, Inflammatory response                                          | Bio-Plex® 200 System<br>Bio-Rad Laboratories, Inc., USA | RECYMAG65K27PMX<br>Merck®, France                    | 0.8  |
| MIP-2 – Macrophage Inflammatory Protein-2, CXCL2                                          | Chemotaxis, Inflammatory response                                          | Bio-Plex® 200 System<br>Bio-Rad Laboratories, Inc., USA | RECYMAG65K27PMX<br>Merck®, France                    | 23.9 |
| NfL – Neurofilament light chain                                                           | Maintenance of neuronal caliber                                            | Simple Plex Ella®<br>ProteinSimple, USA                 | Rat NfL Kit<br>ProteinSimple, USA                    | 2.7  |
| NGF – Nerve growth factor                                                                 | Development and maintenance of the sympathetic and sensory nervous systems | Bio-Plex® 200 System<br>Bio-Rad Laboratories, Inc., USA | EPX01A-32117-901<br>ThermoFisher Scientific®, France | 5.3  |
| OPN – Osteopontin                                                                         | Biom mineralization, Cell adhesion                                         | Bio-Plex® 200 System<br>Bio-Rad Laboratories, Inc., USA | RKTX1MAG-37K<br>Merck®, France                       | 30.0 |
| RANTES – Regulated upon Activation, Normal T Cell Expressed and Presumably Secreted, CCL5 | Chemotaxis, Inflammatory response                                          | Bio-Plex® 200 System<br>Bio-Rad Laboratories, Inc., USA | RECYMAG65K27PMX<br>Merck®, France                    | 1.3  |
| TNFα – Tumor necrosis factor alpha                                                        | Pro-inflammatory function                                                  | Bio-Plex® 200 System<br>Bio-Rad Laboratories, Inc., USA | RECYMAG65K27PMX<br>Merck®, France                    | 2.3  |
| VEGF – Vascular endothelial growth factor                                                 | Angiogenesis, Differentiation                                              | Bio-Plex® 200 System<br>Bio-Rad Laboratories, Inc., USA | RECYMAG65K27PMX<br>Merck®, France                    | 2.6  |

Function of proteins are reported from Human Protein Atlas (proteintatlas.org)

LLOQ: lower limit of quantification
